# Supplementary material for: Theoretical Investigation of HER and OER Electrocatalysts Based on the 2D R-graphyne Completely Composed of Anti-Aromatic Carbon Rings
Source: MDPI journal article supplement (doi:10.3390/molecules28093888), 2023-05-05
Supplement: s1 [file s1]

## Theoretical Investigation of HER and OER Electrocatalysts Based on the 2D R-graphyne Completely Composed of Anti-Aromatic Carbon Rings

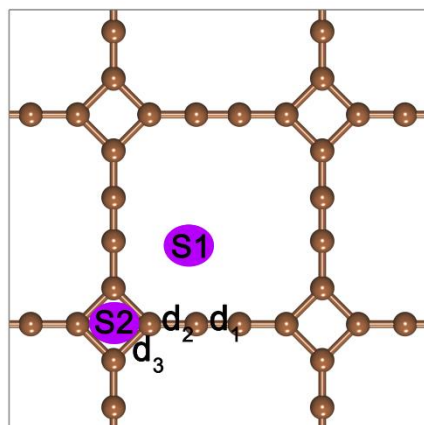

**Figure S1.** Three different C-C bonds are labeled, as well as two possible adsorption sites (S1 and S2) of TM atom.

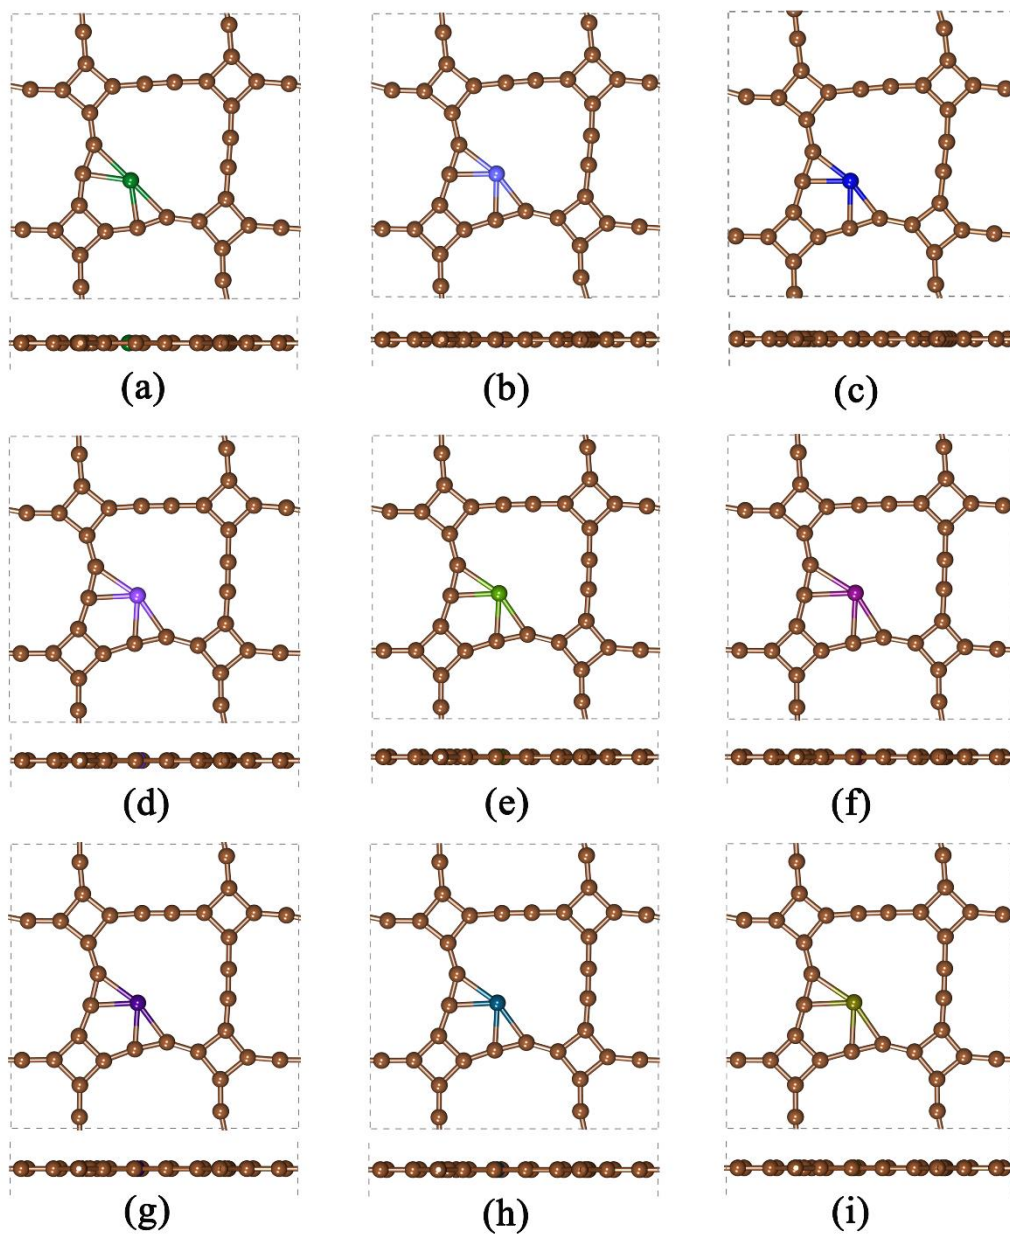

**Figure S2.** The optimized configurations of TM@R-graphyne (top view and side view), in which the doped TM atoms are Fe (a), Co (b), Ni (c), Ru (d), Rh (e), Pd (f), Os (g), Ir (h) and Pt (i), respectively.

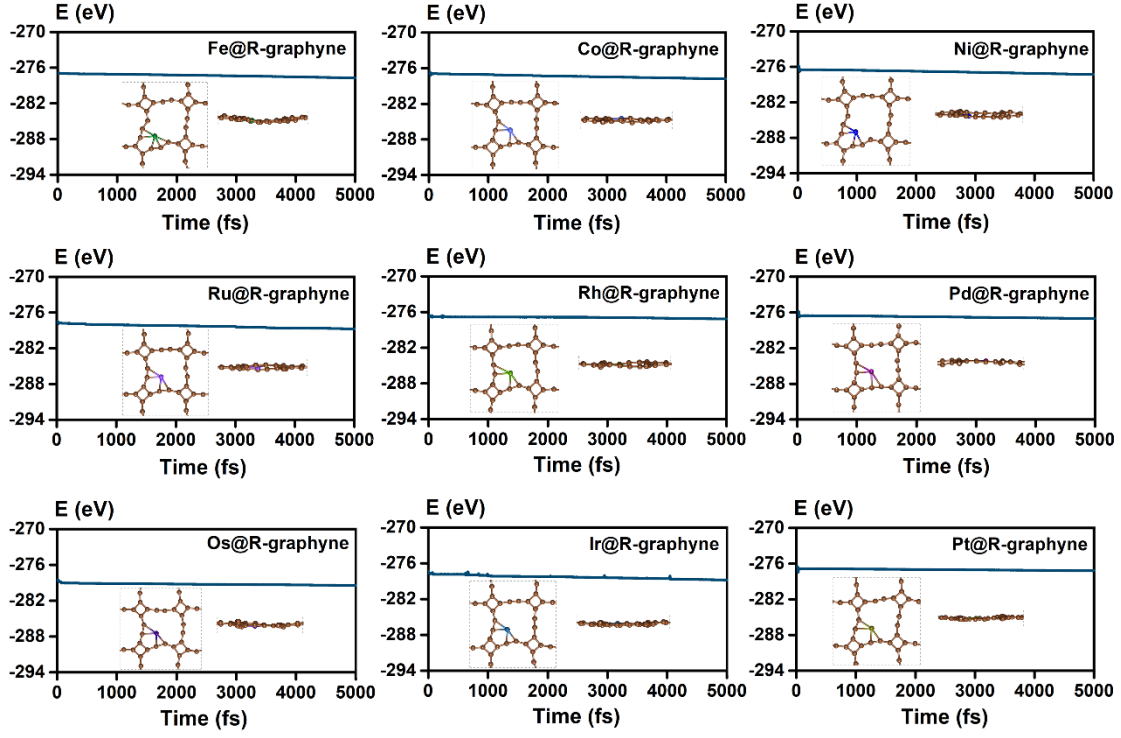

**Figure S3.** The total energy curves of ab initio molecular dynamics (AIMD) simulation for TM@R-graphyne at 500 K, where the insets are the configurations after 5000fs.

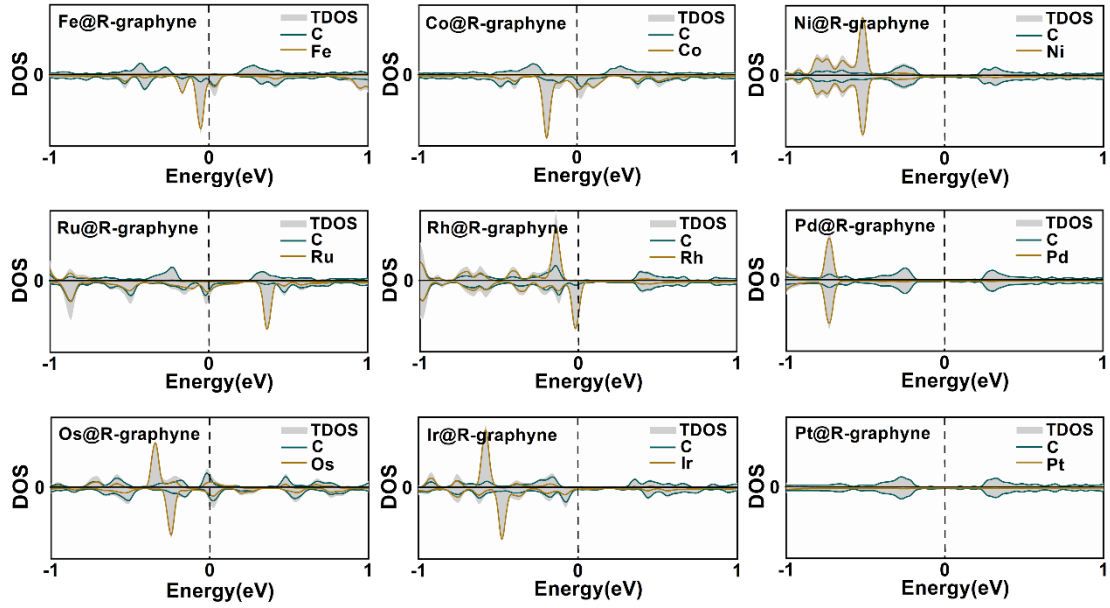

**Figure S4.** The density of states (DOSs) of TM@R-graphyne, where the Fermi energy was set to zero (black dash line).

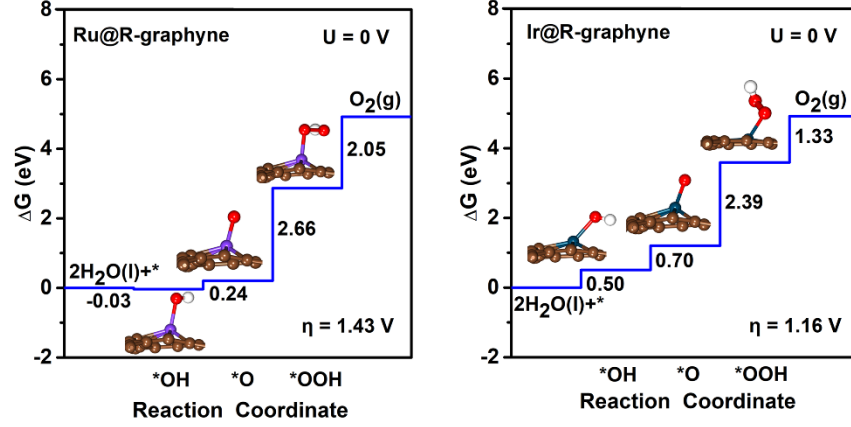

**Figure S5.** The Gibbs free energy diagrams for OER on Ru@R-graphyne and Ir@R-graphyne at an electrode potential of 0 V.

**Table S1.** The optimized lattice constants ( $a=b$ ) and the calculated binding energy ( $E_b$ ) for the TM@R-graphyne.

| System        | $a = b$ (Å)  | $E_b$ (eV) |
|---------------|--------------|------------|
| Fe@R-graphyne | $a=b=11.987$ | -2.509     |
| Co@R-graphyne | $a=b=11.951$ | -3.077     |
| Ni@R-graphyne | $a=b=11.934$ | -3.400     |
| Ru@R-graphyne | $a=b=11.993$ | -4.321     |
| Rh@R-graphyne | $a=b=11.990$ | -3.600     |
| Pd@R-graphyne | $a=b=11.994$ | -2.631     |
| Os@R-graphyne | $a=b=11.990$ | -4.561     |
| Ir@R-graphyne | $a=b=11.980$ | -4.773     |
| Pt@R-graphyne | $a=b=11.981$ | -4.190     |

**Table S2.** The calculated  $\Delta G_{H^*}$  (eV) values for  $H^*$  at the different adsorption sites ( $S_{ad}$ ) on TM@R-graphyne.

| $S_{ad}$        | $\Delta G_{H^*}$ (eV) |        |        |        |        |       |        |        |       |
|-----------------|-----------------------|--------|--------|--------|--------|-------|--------|--------|-------|
|                 | TM=Fe                 | TM=Co  | TM=Ni  | TM=Ru  | TM=Rh  | TM=Pd | TM=Os  | TM=Ir  | TM=Pt |
| T <sub>TM</sub> | 0.142                 | 0.069  | 0.811  | -0.501 | -0.497 | 0.887 | -0.778 | -0.581 | 0.586 |
| T <sub>C1</sub> | -1.246                | -0.715 | -0.600 | -1.106 | -0.920 | 0.240 | -0.140 | -0.005 | 0.267 |
| T <sub>C2</sub> | 0.239                 | 0.442  | 0.448  | -0.104 | -0.118 | 0.351 | 0.272  | 0.246  | 0.361 |
| T <sub>C3</sub> | -0.140                | 0.068  | 0.210  | -0.014 | -0.037 | 0.282 | -0.263 | -0.099 | 0.303 |
| T <sub>C4</sub> | 0.122                 | 0.369  | 0.379  | 0.316  | 0.283  | 0.415 | 0.196  | 0.241  | 0.429 |
| T <sub>C5</sub> | 0.181                 | 0.393  | 0.408  | 0.328  | 0.285  | 0.368 | 0.334  | 0.294  | 0.387 |
| T <sub>C6</sub> | 0.235                 | 0.437  | 0.400  | 0.425  | 0.399  | 0.392 | 0.461  | 0.398  | 0.403 |
| T <sub>C7</sub> | 0.250                 | 0.449  | 0.405  | 0.493  | 0.457  | 0.421 | 0.487  | 0.449  | 0.424 |
| T <sub>C8</sub> | 0.237                 | 0.414  | 0.372  | 0.503  | 0.416  | 0.412 | 0.496  | 0.404  | 0.415 |

# The coordinate files of the intermediate structures in Figure 5

Co@R-graphyne-OH

C Co O H

1.0000000000000000

|                     |                     |                     |
|---------------------|---------------------|---------------------|
| 11.9250001907000005 | 0.0000000000000000  | 0.0000000000000000  |
| 0.0000000000000000  | 11.9259996414000007 | 0.0000000000000000  |
| 0.0000000000000000  | 0.0000000000000000  | 20.0000000000000000 |

C Co O H

32 1 1 1

Direct

|                    |                    |                    |
|--------------------|--------------------|--------------------|
| 0.2316012316863859 | 0.1449320714431060 | 0.4931596432449747 |
| 0.2330285969139873 | 0.3178498496176594 | 0.4966987562556332 |
| 0.3172236452010229 | 0.2320399281476177 | 0.4972715055114728 |
| 0.1443347578026389 | 0.2335340360351049 | 0.4925375512830753 |
| 0.4264268148569820 | 0.2638928540528121 | 0.5047637807252853 |
| 0.0316725604014367 | 0.2380176254753793 | 0.4930829727468753 |
| 0.2664848379522730 | 0.4266607357330518 | 0.5039714791899216 |
| 0.2348409402216388 | 0.0321073458755784 | 0.4941815655881651 |
| 0.7222446700453815 | 0.1825380878270471 | 0.4988449212430157 |
| 0.7376948268174346 | 0.3550357528997496 | 0.5001643691404769 |
| 0.8161640476325817 | 0.2616977223196899 | 0.4975930956427780 |
| 0.6434111083281627 | 0.2779418053406334 | 0.5006040655532922 |
| 0.9282102993081807 | 0.2503194647581723 | 0.4952569922979025 |
| 0.5299842319505461 | 0.2958519901012522 | 0.5030889784737855 |
| 0.7489962076241837 | 0.4673554744597074 | 0.5026673205518891 |
| 0.7269924458137352 | 0.0694727462715317 | 0.4995230722296662 |
| 0.2777800292903439 | 0.6439811677292352 | 0.5016120831552152 |
| 0.2598642375975643 | 0.8166860941165847 | 0.4987026825456712 |
| 0.3539270394230010 | 0.7393173925611073 | 0.5015734490945952 |
| 0.1815853272839625 | 0.7222068410363077 | 0.4993616719369818 |
| 0.4662158036372303 | 0.7515121096405355 | 0.5038063697848044 |
| 0.0684726993311458 | 0.7265525829086408 | 0.4993746707457925 |
| 0.2474865505605209 | 0.9287702438196682 | 0.4963541965701236 |
| 0.2967157293603570 | 0.5309343147901276 | 0.5033801411224923 |
| 0.7677632736615158 | 0.6831485660394181 | 0.5042029144656990 |
| 0.7681019887526258 | 0.8564703000091491 | 0.5020758271619427 |
| 0.8555462976214814 | 0.7684000267571268 | 0.5018818715462978 |
| 0.6821274718343826 | 0.7693679501989164 | 0.5044715161407237 |
| 0.9679991272408504 | 0.7558909421393664 | 0.5001381151731410 |
| 0.5692969381412391 | 0.7648376790205806 | 0.5048731078083267 |
| 0.7562511433113126 | 0.9690216602583006 | 0.5004865526653963 |
| 0.7625646162237834 | 0.5703644058537932 | 0.5040442907750851 |
| 0.4325331812459858 | 0.4319169143271347 | 0.5255468393451346 |
| 0.4861719436381072 | 0.4853170037617869 | 0.6032002036848464 |
| 0.5450953972880230 | 0.5416065016741377 | 0.5966335385995224 |

Co@R-graphyne-O

C Co O

1.0000000000000000

|                     |                     |                     |
|---------------------|---------------------|---------------------|
| 11.9300003052000001 | 0.0000000000000000  | 0.0000000000000000  |
| 0.0000000000000000  | 11.9280004501000008 | 0.0000000000000000  |
| 0.0000000000000000  | 0.0000000000000000  | 20.0000000000000000 |

| C                  | Co                 | O                  |
|--------------------|--------------------|--------------------|
| 32                 | 1                  | 1                  |
| Direct             |                    |                    |
| 0.2344854200432382 | 0.1475819884496122 | 0.4971964466277364 |
| 0.2348910725769666 | 0.3205960767125504 | 0.5011997643187517 |
| 0.3194834322301482 | 0.2359039020260005 | 0.5009013430053227 |
| 0.1465157236105735 | 0.2356263194856744 | 0.4974894055855984 |
| 0.4289738094303125 | 0.2693680414594648 | 0.5046819951234240 |
| 0.0342941294078531 | 0.2387922152527398 | 0.4964864620930282 |
| 0.2687950742401174 | 0.4299472985986905 | 0.5052312661518137 |
| 0.2376730345726154 | 0.0353129811875548 | 0.4960786666540246 |
| 0.7238590676180440 | 0.1831017399516239 | 0.4982324887432852 |
| 0.7413082610812730 | 0.3556444405149902 | 0.4989794453596429 |
| 0.8188261017295964 | 0.2613480831881523 | 0.4975267365304212 |
| 0.6465005769615305 | 0.2792004014161093 | 0.4996515738589738 |
| 0.9304909746256761 | 0.2495544114916349 | 0.4966128822816152 |
| 0.5333685969962808 | 0.2998334768436192 | 0.5019297318219650 |
| 0.7534568271641328 | 0.4677755323070779 | 0.4997173126133660 |
| 0.7280374667972926 | 0.0699730274271339 | 0.4985463808105067 |
| 0.2790751040733482 | 0.6474527121848107 | 0.5001806285693784 |
| 0.2610032681373184 | 0.8198452363873941 | 0.4976490648082401 |
| 0.3553816414396263 | 0.7423717783817562 | 0.4992382207099392 |
| 0.1829291197816681 | 0.7247028311347540 | 0.4986354370245255 |
| 0.4675091921802190 | 0.7544163490883593 | 0.4998654531257157 |
| 0.0698159060591302 | 0.7286076103062932 | 0.4988615062522659 |
| 0.2489397670890464 | 0.9315375311249315 | 0.4964181589553701 |
| 0.2996990137922823 | 0.5342665773598796 | 0.5025540933957439 |
| 0.7694486192453736 | 0.6836555192736891 | 0.5004373069296559 |
| 0.7693836155361720 | 0.8570053419586944 | 0.4997373427778764 |
| 0.8567697177041573 | 0.7695120768525873 | 0.4997980419524331 |
| 0.6834198309067560 | 0.7697542409300658 | 0.5003956061591611 |
| 0.9693490603224969 | 0.7576362259125211 | 0.4991776038155700 |
| 0.5707783867710291 | 0.7660385849953553 | 0.5001841240072592 |
| 0.7574644186356311 | 0.9695966017696176 | 0.4989795308264081 |
| 0.7655021832810763 | 0.5710004515959393 | 0.5001619219922938 |
| 0.4335109531168211 | 0.4337974825472865 | 0.5190589212177221 |
| 0.4678606998422174 | 0.4672629978834512 | 0.5952551179009604 |

# Co@R-graphyne-OOH

| C                   | Co                  | O                   | H |
|---------------------|---------------------|---------------------|---|
| 32                  | 1                   | 2                   | 1 |
| 1.0000000000000000  |                     |                     |   |
| 11.9300003052000001 | 0.0000000000000000  | 0.0000000000000000  |   |
| 0.0000000000000000  | 11.9270000457999998 | 0.0000000000000000  |   |
| 0.0000000000000000  | 0.0000000000000000  | 20.0000000000000000 |   |

| C                  | Co                 | O                  | H |
|--------------------|--------------------|--------------------|---|
| 32                 | 1                  | 2                  | 1 |
| Direct             |                    |                    |   |
| 0.2341610563930558 | 0.1457055178089505 | 0.4894794050940445 |   |
| 0.2320535970494806 | 0.3188243882705999 | 0.4942702139099852 |   |
| 0.3185778795134724 | 0.2344670917309872 | 0.4929754303545512 |   |
| 0.1455200952552555 | 0.2325595110633615 | 0.4906497406884470 |   |
| 0.4271094567980929 | 0.2667337007197016 | 0.5019757381738268 |   |

|                    |                    |                    |
|--------------------|--------------------|--------------------|
| 0.0326416474622430 | 0.2350127712785664 | 0.4928248563487357 |
| 0.2618400724663363 | 0.4278637185676467 | 0.5037698167401318 |
| 0.2384385451794816 | 0.0329984651462222 | 0.4910366307497864 |
| 0.7230359125900616 | 0.1803345493468950 | 0.4995618207019717 |
| 0.7398356555768441 | 0.3526935241012942 | 0.5026583053484167 |
| 0.8171731669247352 | 0.2588415340029523 | 0.4988838498279234 |
| 0.6444573162087512 | 0.2763855716558677 | 0.5028053865737968 |
| 0.9293373002837362 | 0.2469206404393280 | 0.4957432323201251 |
| 0.5317483931184593 | 0.2958975558023532 | 0.5048071671603481 |
| 0.7516689768080380 | 0.4649807941055896 | 0.5045615836570214 |
| 0.7273451453906096 | 0.0673417186446667 | 0.4991025829970798 |
| 0.2774296041555087 | 0.6447122649426642 | 0.5027962544045409 |
| 0.2607143864985573 | 0.8174853731986208 | 0.4982661970553126 |
| 0.3541190093718112 | 0.7393054161722593 | 0.5015522092875592 |
| 0.1818203849602318 | 0.7233944716177141 | 0.5002858410866093 |
| 0.4664704299584379 | 0.7506609634068596 | 0.5029583648698067 |
| 0.0688815928742558 | 0.7275326798904064 | 0.5005806270582610 |
| 0.2494716304441934 | 0.9294968014540497 | 0.4943622623087957 |
| 0.2954537711502375 | 0.5312147241924595 | 0.5057526164314248 |
| 0.7683417445526587 | 0.6808999841339972 | 0.5046199063595869 |
| 0.7677843048052826 | 0.8542537807325510 | 0.5013668509559271 |
| 0.8556285730772692 | 0.7667420477201317 | 0.5020333150784736 |
| 0.6823761755415856 | 0.7667189936842393 | 0.5039508459929303 |
| 0.9680916057296862 | 0.7556542035894068 | 0.5009041498072877 |
| 0.5695732078583701 | 0.7624322223768626 | 0.5038269174847433 |
| 0.7560733300845685 | 0.9666925378814825 | 0.4995502370927370 |
| 0.7639981004198242 | 0.5681382835507990 | 0.5052950295490274 |
| 0.4287890050529995 | 0.4306751913849355 | 0.5261609278384876 |
| 0.4598119834681882 | 0.4532036424611295 | 0.6129557784831150 |
| 0.4981312012724004 | 0.5665417154061619 | 0.6296307401522022 |
| 0.5158056547052727 | 0.5553536115183023 | 0.6770651770569612 |

Ni@R-graphyne-OH

| C                   | Ni                  | O                   | H |
|---------------------|---------------------|---------------------|---|
| 1.000000000000000   |                     |                     |   |
| 11.9399995804000003 | 0.0000000000000000  | 0.0000000000000000  |   |
| 0.0000000000000000  | 11.9359998702999999 | 0.0000000000000000  |   |
| 0.0000000000000000  | 0.0000000000000000  | 20.0000000000000000 |   |

| C  | Ni | O | H |
|----|----|---|---|
| 32 | 1  | 1 | 1 |

Direct

|                    |                    |                    |
|--------------------|--------------------|--------------------|
| 0.2305813276378451 | 0.1455469239188386 | 0.4930133251750481 |
| 0.2316143039993003 | 0.3184153231045547 | 0.4948592323797764 |
| 0.3162949810417846 | 0.2334255351041837 | 0.4949653869612795 |
| 0.1433254030041632 | 0.2335872885024510 | 0.4928264387147014 |
| 0.4254933102202907 | 0.2650428302456039 | 0.5015991190705139 |
| 0.0306252852731617 | 0.2374181660251594 | 0.4946714459112669 |
| 0.2627093271350302 | 0.4280081257454317 | 0.5016466623649346 |
| 0.2337493180759981 | 0.0329653156450365 | 0.4949854237946765 |
| 0.7216124382870837 | 0.1816519471306606 | 0.5020269264226206 |
| 0.7375941370731013 | 0.3540602533522299 | 0.5040473150245512 |
| 0.8153259105391050 | 0.2604931739636379 | 0.5010772599101729 |

|                    |                    |                    |
|--------------------|--------------------|--------------------|
| 0.6427885452496805 | 0.2770298278904393 | 0.5044759634489595 |
| 0.9273586063010003 | 0.2491252494709604 | 0.4977583824285129 |
| 0.5295657662153271 | 0.2951995808484765 | 0.5053486972398511 |
| 0.7497305899292083 | 0.4663159096862782 | 0.5049849922215706 |
| 0.7262075163266597 | 0.0685632086083857 | 0.5015441014007167 |
| 0.2746087957983798 | 0.6453631804786765 | 0.5047979680521768 |
| 0.2584193412857737 | 0.8178426857706400 | 0.5013867889090969 |
| 0.3518514613206822 | 0.7398004757715889 | 0.5043300331109509 |
| 0.1793304308574569 | 0.7241391565728952 | 0.5023033664406028 |
| 0.4640966807946896 | 0.7521080187515828 | 0.5047914969213331 |
| 0.0663753852884147 | 0.7282586185769445 | 0.5018006457673327 |
| 0.2466148727374975 | 0.9297425108737525 | 0.4980776611665028 |
| 0.2900127886701800 | 0.5320215557926661 | 0.5052023963421154 |
| 0.7654104864416343 | 0.6822246499657361 | 0.5046320771972406 |
| 0.7658672076300163 | 0.8553503369829427 | 0.5025457445783750 |
| 0.8531059281332216 | 0.7676499216289562 | 0.5027308471812612 |
| 0.6797661242597181 | 0.7685148508022375 | 0.5044317254286902 |
| 0.9655567514539560 | 0.7560149761800434 | 0.5017781729325417 |
| 0.5669781794354241 | 0.7652127235553191 | 0.5047383288030765 |
| 0.7547209419251049 | 0.9679895692330571 | 0.5015865736335359 |
| 0.7615319901991597 | 0.5694917615450480 | 0.5052181919355547 |
| 0.4311916774388307 | 0.4311843720577747 | 0.5162835508743334 |
| 0.5031703400313284 | 0.5118829569023750 | 0.5806846687046000 |
| 0.5762238829898005 | 0.4805089653154455 | 0.5922191465515380 |

Ni@R-graphyne-O

C Ni O

1.000000000000000

11.9399995804000003 0.0000000000000000 0.0000000000000000

0.0000000000000000 11.9289999007999992 0.0000000000000000

0.0000000000000000 0.0000000000000000 20.0000000000000000

C Ni O

32 1 1

Direct

|                    |                    |                    |
|--------------------|--------------------|--------------------|
| 0.2314008478705672 | 0.1455327963451669 | 0.4934657818985055 |
| 0.2311267205937522 | 0.3183842846460078 | 0.4962040802407598 |
| 0.3159605598488739 | 0.2346462950863159 | 0.4958922149727268 |
| 0.1432041243527597 | 0.2327533413091229 | 0.4938200032110420 |
| 0.4254744742272871 | 0.2665175609164548 | 0.5013365706057277 |
| 0.0306551155458861 | 0.2360603063043651 | 0.4953338358789358 |
| 0.2613750518475103 | 0.4282612797957600 | 0.5017211599456620 |
| 0.2359496436831625 | 0.0329452907608645 | 0.4945137332074957 |
| 0.7217091235044391 | 0.1813900452597992 | 0.5008403647990602 |
| 0.7377185717999168 | 0.3541179896283237 | 0.5032414515652525 |
| 0.8154917424092805 | 0.2603744400012172 | 0.5004639197604805 |
| 0.6431852672382639 | 0.2769889256251113 | 0.5031507324365441 |
| 0.9273842857310894 | 0.2485550977218345 | 0.4978653250265962 |
| 0.5297096641733748 | 0.2927557783554658 | 0.5036323154696406 |
| 0.7505726912304076 | 0.4662858495869003 | 0.5044973259873966 |
| 0.7264115979624056 | 0.0682779401061101 | 0.5001882786710165 |
| 0.2768587102978252 | 0.6453114729908277 | 0.5028539984107820 |
| 0.2611728845805015 | 0.8176981754723465 | 0.4995687713131341 |



|                    |                    |                    |
|--------------------|--------------------|--------------------|
| 0.3545228631085067 | 0.7392823367121664 | 0.5022363143916730 |
| 0.1818102054094071 | 0.7241058922193604 | 0.5008041658156189 |
| 0.4666860703994722 | 0.7513025695964530 | 0.5033438687797638 |
| 0.0687944610147647 | 0.7285351130872257 | 0.5008372800684766 |
| 0.2495544772051361 | 0.9296541528913687 | 0.4968075638475292 |
| 0.2908936906812483 | 0.5313604097876233 | 0.5036410490971049 |
| 0.7684345147379268 | 0.6819683323986909 | 0.5044025643290060 |
| 0.7678791346428773 | 0.8553242127247479 | 0.5018664418830343 |
| 0.8555436514730074 | 0.7679175670155128 | 0.5022193362992140 |
| 0.6823190528080353 | 0.7678398703077877 | 0.5039830109970771 |
| 0.9681325663263856 | 0.7566528323915528 | 0.5011521540525514 |
| 0.5696357101613475 | 0.7642828137234678 | 0.5039028727275718 |
| 0.7558491353959137 | 0.9678844480820955 | 0.5003942948251444 |
| 0.7647431799822505 | 0.5691736039027702 | 0.5048810834486545 |
| 0.4379343873042178 | 0.4385962839191568 | 0.5168118092801992 |
| 0.5215558654521861 | 0.5254926653280122 | 0.5615562567566215 |

# Ni@R-graphyne-OOH

C Ni O H

1.0000000000000000

|                     |                     |                     |
|---------------------|---------------------|---------------------|
| 11.9320001601999994 | 0.0000000000000000  | 0.0000000000000000  |
| 0.0000000000000000  | 11.9289999007999992 | 0.0000000000000000  |
| 0.0000000000000000  | 0.0000000000000000  | 20.0000000000000000 |

C Ni O H

32 1 2 1

Direct

|                    |                    |                    |
|--------------------|--------------------|--------------------|
| 0.2325450413969450 | 0.1435054935513746 | 0.4919893708486300 |
| 0.2341706302378977 | 0.3166622641748157 | 0.4941709048249070 |
| 0.3184892983262344 | 0.2310436787592110 | 0.4937664444344799 |
| 0.1455458910064047 | 0.2318311033340053 | 0.4922109346975617 |
| 0.4279689470352938 | 0.2609447465859937 | 0.5007572182222325 |
| 0.0329171288667251 | 0.2359200239900144 | 0.4945945828092134 |
| 0.2661160440706332 | 0.4257158464629068 | 0.5021671935213093 |
| 0.2356874140728048 | 0.0307982260428300 | 0.4945938747042944 |
| 0.7242340828579908 | 0.1798644138375871 | 0.5017048047129387 |
| 0.7391272287843523 | 0.3525343460562253 | 0.5038196402055020 |
| 0.8175843141128274 | 0.2594235139290237 | 0.5010731821106092 |
| 0.6449674450731278 | 0.2748744547915586 | 0.5039649657299869 |
| 0.9296468263910118 | 0.2482987301098835 | 0.4978368948232588 |
| 0.5315428236417963 | 0.2904654136181933 | 0.5043987007483837 |
| 0.7510739776020706 | 0.4648098039089003 | 0.5044258481066749 |
| 0.7288399089680644 | 0.0669289280675306 | 0.5008629743986630 |
| 0.2773945519808743 | 0.6430166634346228 | 0.5069866368663642 |
| 0.2606689930854793 | 0.8156662519364833 | 0.5023501977552111 |
| 0.3542431856438398 | 0.7379013822030135 | 0.5056643313090878 |
| 0.1817621763280716 | 0.7216841038653223 | 0.5038412536100575 |
| 0.4664977333240859 | 0.7500527972760536 | 0.5050752176714624 |
| 0.0688881553830371 | 0.7262514397726353 | 0.5027182491091817 |
| 0.2486879278790895 | 0.9275870434671692 | 0.4982329573593344 |
| 0.2947190227921546 | 0.5298321632046803 | 0.5076669914585925 |
| 0.7683864313414818 | 0.6805197596154310 | 0.5039708497683754 |
| 0.7681754273291879 | 0.8536926880139565 | 0.5017778797379360 |

|                    |                    |                    |
|--------------------|--------------------|--------------------|
| 0.8558093382497017 | 0.7662845295822022 | 0.5021800096965203 |
| 0.6823421474712954 | 0.7663416507415682 | 0.5036728099480631 |
| 0.9682566501108640 | 0.7549703335402251 | 0.5019380790185421 |
| 0.5695743597195573 | 0.7623230559666673 | 0.5042598048034268 |
| 0.7569886398472990 | 0.9661805753295237 | 0.5008258278068281 |
| 0.7644844243184428 | 0.5677624296328158 | 0.5044722481971161 |
| 0.4313159144563375 | 0.4296439848801220 | 0.5189383824065592 |
| 0.5152582260457462 | 0.4826994113860115 | 0.5885831800984029 |
| 0.4719427897366468 | 0.5799937338781950 | 0.6225035831793481 |
| 0.4850468315126350 | 0.5584850880532335 | 0.6692540543009456 |

# Rh@R-graphyne-OH

| C                   | Rh                  | O                   | H |
|---------------------|---------------------|---------------------|---|
| 1.000000000000000   |                     |                     |   |
| 11.9899997711000008 | 0.0000000000000000  | 0.0000000000000000  |   |
| 0.0000000000000000  | 11.9899997711000008 | 0.0000000000000000  |   |
| 0.0000000000000000  | 0.0000000000000000  | 20.0000000000000000 |   |

| C  | Rh | O | H |
|----|----|---|---|
| 32 | 1  | 1 | 1 |

## Direct

|                    |                    |                    |
|--------------------|--------------------|--------------------|
| 0.2398353315018473 | 0.1535624110816876 | 0.5017664877097943 |
| 0.2385616875051266 | 0.3259318142278945 | 0.5033918280528648 |
| 0.3249343715313338 | 0.2409591258625848 | 0.5035073020466201 |
| 0.1524402606034977 | 0.2399248241865355 | 0.5016842353663779 |
| 0.4341175101877453 | 0.2727336638663836 | 0.5030772657465010 |
| 0.0399636847642460 | 0.2397786567573159 | 0.5003677294966280 |
| 0.2675099495431635 | 0.4359726333060860 | 0.5027419188809944 |
| 0.2406985244061540 | 0.0413375606369899 | 0.5003591949842109 |
| 0.7303701840993321 | 0.1746696843022478 | 0.5007664810639758 |
| 0.7476696123926951 | 0.3465004198878858 | 0.5011144435217693 |
| 0.8243741401045702 | 0.2529714420378544 | 0.5005258249468374 |
| 0.6524186118403361 | 0.2706261442261683 | 0.5014479447186253 |
| 0.9365515358465069 | 0.2436045720106151 | 0.5000863408991156 |
| 0.5417906627125706 | 0.2963535490197651 | 0.5015590527682525 |
| 0.7559145243240522 | 0.4587210827712593 | 0.5009928975666903 |
| 0.7309361086060910 | 0.0620397914715303 | 0.5003246610376391 |
| 0.2668786568252914 | 0.6539716226637192 | 0.4996936400811965 |
| 0.2525595270154041 | 0.8258872952315482 | 0.4993268538444904 |
| 0.3445831722234894 | 0.7473490660861050 | 0.4996349646307092 |
| 0.1725385420417158 | 0.7333035726000262 | 0.4992794696857326 |
| 0.4569090741413888 | 0.7542356312910932 | 0.4998652628349591 |
| 0.0600352738498667 | 0.7352191002969182 | 0.4993970575425458 |
| 0.2447345852692694 | 0.9379262804764490 | 0.4996390645282075 |
| 0.2893753240396097 | 0.5428087260555952 | 0.5002999669534027 |
| 0.7590463511165073 | 0.6746632334737277 | 0.5005258930169511 |
| 0.7578055316577322 | 0.8473892285962473 | 0.5000829894477007 |
| 0.8454150344703314 | 0.7610857283768881 | 0.5001080004938137 |
| 0.6727713246395000 | 0.7597000513999396 | 0.5003519918010276 |
| 0.9577104966474255 | 0.7539288231550700 | 0.4997170326792187 |
| 0.5603040695292760 | 0.7575295420649013 | 0.5000771570592605 |
| 0.7494439817677591 | 0.9596611518094873 | 0.5000252879874100 |
| 0.7584013432644225 | 0.5621941681736027 | 0.5008306707906338 |

|                    |                    |                    |
|--------------------|--------------------|--------------------|
| 0.4410358809517451 | 0.4432237649669713 | 0.5037522480416434 |
| 0.4710538421763166 | 0.4790420368734693 | 0.5961157545821405 |
| 0.5237613664036835 | 0.4234536837554392 | 0.6131330951920625 |

# Rh@R-graphyne-O

C Rh O

1.0000000000000000

|                     |                     |                     |
|---------------------|---------------------|---------------------|
| 11.9899997711000008 | 0.0000000000000000  | 0.0000000000000000  |
| 0.0000000000000000  | 11.9899997711000008 | 0.0000000000000000  |
| 0.0000000000000000  | 0.0000000000000000  | 20.0000000000000000 |

C Rh O

32 1 1

Direct

|                    |                    |                    |
|--------------------|--------------------|--------------------|
| 0.2379211488015935 | 0.1512406294867074 | 0.4989409009544571 |
| 0.2385248288096639 | 0.3235188784890572 | 0.5027869349361102 |
| 0.3229978292288172 | 0.2383923634710315 | 0.5027592289864726 |
| 0.1508635404310756 | 0.2391775590933732 | 0.4989215533736454 |
| 0.4333230045490315 | 0.2683714431365302 | 0.5046959814637006 |
| 0.0388448364156152 | 0.2405061640852873 | 0.4971919854850907 |
| 0.2695256626554149 | 0.4336474818529168 | 0.5051486806494684 |
| 0.2384888959682094 | 0.0392926791609803 | 0.4973303729298838 |
| 0.7304746048574136 | 0.1738614295113082 | 0.4977558927358477 |
| 0.7447786072364037 | 0.3461000349108129 | 0.4983453373769237 |
| 0.8234612425167397 | 0.2535006458633132 | 0.4972863945846146 |
| 0.6516614196446963 | 0.2683118428760130 | 0.4988148508077166 |
| 0.9352453332673367 | 0.2451648162304929 | 0.4967879131263986 |
| 0.5397695627955665 | 0.2888766194528495 | 0.5009429591491092 |
| 0.7523312846969245 | 0.4582191294345263 | 0.4989506098341875 |
| 0.7323611121348393 | 0.0611501460017359 | 0.4982349138728853 |
| 0.2686836737275998 | 0.6520877536030013 | 0.4996150681585020 |
| 0.2524695159002283 | 0.8239169807526636 | 0.4977872097432362 |
| 0.3456026007460133 | 0.7458770406331960 | 0.4993347202328801 |
| 0.1735979828679313 | 0.7301999338072338 | 0.4980357590947239 |
| 0.4576817948472595 | 0.7540547438137253 | 0.5000759156248911 |
| 0.0608228657133766 | 0.7315447726945422 | 0.4982318733855631 |
| 0.2433907066052662 | 0.9356275204381318 | 0.4971769742639027 |
| 0.2909523568151018 | 0.5403794330441140 | 0.5018812064117087 |
| 0.7590607360763059 | 0.6739651018019202 | 0.4997856380485085 |
| 0.7596156701595250 | 0.8465759606207290 | 0.4993230497914378 |
| 0.8462416265889562 | 0.7594235561922560 | 0.4991654255224640 |
| 0.6734901118217756 | 0.7601071937106879 | 0.5000497529544605 |
| 0.9586687254673164 | 0.7510486711175292 | 0.4986007325460880 |
| 0.5611201647208469 | 0.7587184763645597 | 0.5002229685916587 |
| 0.7518757095080169 | 0.9590192012628508 | 0.4987682326199651 |
| 0.7569760488306845 | 0.5616417805804456 | 0.4994341098061372 |
| 0.4417779421515925 | 0.4424717611046615 | 0.5155977358771241 |
| 0.4800789054428597 | 0.4738383354008205 | 0.5993191070602399 |

# Rh@R-graphyne-OOH

C Rh O H

1.0000000000000000

|                     |                     |                     |   |
|---------------------|---------------------|---------------------|---|
| 11.9849996566999994 | 0.0000000000000000  | 0.0000000000000000  |   |
| 0.0000000000000000  | 11.9899997711000008 | 0.0000000000000000  |   |
| 0.0000000000000000  | 0.0000000000000000  | 20.0000000000000000 |   |
| C                   | Rh                  | O                   | H |
| 32                  | 1                   | 2                   | 1 |
| Direct              |                     |                     |   |
| 0.2410683380686179  | 0.1503741249480652  | 0.5057066686942482  |   |
| 0.2419183400955086  | 0.3227200152349908  | 0.5084855522897657  |   |
| 0.3271448964550939  | 0.2366066168665930  | 0.5087073232211043  |   |
| 0.1549299264692528  | 0.2374092947309670  | 0.5054399510615077  |   |
| 0.4369516304768139  | 0.2659285785128201  | 0.5069528305922090  |   |
| 0.0423549808888943  | 0.2383259987685227  | 0.5020144343453929  |   |
| 0.2727190435316629  | 0.4323566595221190  | 0.5067858810510089  |   |
| 0.2413811953149495  | 0.0378044077898934  | 0.5028971279172170  |   |
| 0.7344588929061627  | 0.1713329634919818  | 0.4992154246522145  |   |
| 0.7485572975425132  | 0.3432920781563820  | 0.4985960566653909  |   |
| 0.8267254876589422  | 0.2514823296180076  | 0.4986597559814600  |   |
| 0.6548003990691202  | 0.2657488917788450  | 0.4995834202216222  |   |
| 0.9391912875734193  | 0.2433800989931369  | 0.4998354966687386  |   |
| 0.5437642030646013  | 0.2875806948680457  | 0.5017692866670957  |   |
| 0.7558435812928320  | 0.4558522041702353  | 0.4988580306598653  |   |
| 0.7363063342066755  | 0.0589814005686890  | 0.4998914285500951  |   |
| 0.2707578285188066  | 0.6502617825338805  | 0.5004340186171250  |   |
| 0.2550366312083794  | 0.8222168298237322  | 0.5003311828626416  |   |
| 0.3473838575102311  | 0.7446333417450679  | 0.4999269215906298  |   |
| 0.1755362493881286  | 0.7291821493218956  | 0.5004900896348642  |   |
| 0.4599183307728250  | 0.7525172659126582  | 0.4998551831493823  |   |
| 0.0631757252485484  | 0.7304707265973247  | 0.5008336781388940  |   |
| 0.2460778998649622  | 0.9345670996642830  | 0.5013248207547047  |   |
| 0.2943783295908275  | 0.5395355087712250  | 0.5020018517258449  |   |
| 0.7610100433228756  | 0.6718188487207897  | 0.5003978575999413  |   |
| 0.7618443914635646  | 0.8443567143085949  | 0.5007189346552643  |   |
| 0.8486025568649391  | 0.7570606277511135  | 0.5007574999873602  |   |
| 0.6759740175202663  | 0.7574497547243214  | 0.5005197318377375  |   |
| 0.9606750691767717  | 0.7490103622553017  | 0.5008397119465064  |   |
| 0.5631752502080890  | 0.7560652645606621  | 0.5000703725621490  |   |
| 0.7546326817324990  | 0.9565317054146807  | 0.5003743762930890  |   |
| 0.7592871205444106  | 0.5590973340275373  | 0.4995296340187865  |   |
| 0.4449137931504447  | 0.4396278546739238  | 0.5065807106678522  |   |
| 0.5030625844695051  | 0.4722513341736574  | 0.5939453337604497  |   |
| 0.4544392896225340  | 0.5693346513735191  | 0.6245954460819407  |   |
| 0.4039225712063333  | 0.5353745346265512  | 0.6575639688758903  |   |
